# Supplementary material
Source: HighWire-hosted journal article supplement (https://militaryhealth.bmj.com/content/168/3/218)
Supplement: inline-supplementary-material-1 [file inline-supplementary-material-1.pdf]

## Supplementary Information

## Appendix A

Improvements in body weight during military service with respect to military characteristics according to participants who were underweight before military service

|                                 | N   | Maintenance |     | Improvement |      | Deterioration |      | <i>p</i> |
|---------------------------------|-----|-------------|-----|-------------|------|---------------|------|----------|
|                                 |     | N           | %   | N           | %    | N             | %    |          |
| Military                        |     |             |     |             |      |               |      |          |
| Army                            | 100 | 2           | 2.0 | 69          | 69.0 | 29            | 29.0 | 0.1647 * |
| Navy                            | 45  | 0           | 0.0 | 38          | 84.4 | 7             | 15.6 |          |
| Marine corps                    | 22  | 1           | 4.6 | 19          | 86.4 | 2             | 9.1  |          |
| Air force                       | 63  | 1           | 1.6 | 45          | 71.4 | 17            | 27.0 |          |
| Branches                        |     |             |     |             |      |               |      |          |
| Combat                          | 139 | 0           | 0.0 | 103         | 74.1 | 36            | 25.9 | 0.0997 * |
| Technical                       | 76  | 4           | 5.3 | 56          | 73.7 | 16            | 21.1 |          |
| Administrative/special          | 15  | 0           | 0.0 | 12          | 80.0 | 3             | 20.0 |          |
| Service period (months)         |     |             |     |             |      |               |      |          |
| <6                              | 52  | 0           | 0.0 | 43          | 82.7 | 9             | 17.3 | 0.1856 * |
| 6–11                            | 62  | 3           | 4.8 | 39          | 62.9 | 20            | 32.3 |          |
| 12–17                           | 78  | 1           | 1.3 | 59          | 75.6 | 18            | 23.1 |          |
| ≥18                             | 38  | 0           | 0.0 | 30          | 79.0 | 8             | 21.1 |          |
| Types of workplace              |     |             |     |             |      |               |      |          |
| Large, middle, and small cities | 137 | 2           | 1.5 | 108         | 78.8 | 27            | 19.7 | 0.1794 * |
| Country, town, township         | 75  | 1           | 1.3 | 51          | 68.0 | 23            | 30.7 |          |
| Remote areas                    | 18  | 1           | 5.6 | 12          | 66.7 | 5             | 27.8 |          |
| Working hours (hours/day)       |     |             |     |             |      |               |      |          |
| <40                             | 52  | 1           | 1.9 | 41          | 78.9 | 10            | 19.2 | 0.9174 * |
| 40–55                           | 115 | 2           | 1.7 | 85          | 73.9 | 28            | 24.4 |          |
| ≥56                             | 63  | 1           | 1.6 | 45          | 71.4 | 17            | 27.0 |          |
| Total                           | 230 | 4           | 1.7 | 171         | 74.4 | 55            | 23.9 |          |

\* Analyses were performed using Fisher's exact test.

**Appendix B**

Improvements in body weight during military service with respect to military characteristics according to participants who were normal weight before military service

|                                 | N    | Maintenance |      | Deterioration |      | <i>p</i> |
|---------------------------------|------|-------------|------|---------------|------|----------|
|                                 |      | N           | %    | N             | %    |          |
| Military                        |      |             |      |               |      |          |
| Army                            | 500  | 384         | 76.8 | 116           | 23.2 | 0.0034   |
| Navy                            | 243  | 198         | 81.5 | 45            | 18.5 |          |
| Marine corps                    | 134  | 121         | 90.3 | 13            | 9.7  |          |
| Air force                       | 392  | 323         | 82.4 | 69            | 17.6 |          |
| Branches                        |      |             |      |               |      |          |
| Combat                          | 726  | 582         | 80.2 | 144           | 19.8 | 0.2673   |
| Technical                       | 413  | 332         | 80.4 | 81            | 19.6 |          |
| Administrative/special          | 130  | 112         | 86.2 | 18            | 13.9 |          |
| Service period (months)         |      |             |      |               |      |          |
| <6                              | 221  | 175         | 79.2 | 46            | 20.8 | 0.6193   |
| 6–11                            | 366  | 296         | 80.9 | 70            | 19.1 |          |
| 12–17                           | 443  | 355         | 80.1 | 88            | 19.9 |          |
| ≥18                             | 239  | 200         | 83.7 | 39            | 16.3 |          |
| Type of workplace               |      |             |      |               |      |          |
| Large, middle, and small cities | 786  | 650         | 82.7 | 136           | 17.3 | 0.0540   |
| Country, town, township         | 392  | 309         | 78.8 | 83            | 21.2 |          |
| Remote areas                    | 91   | 67          | 73.6 | 24            | 26.4 |          |
| Working hours (hours/day)       |      |             |      |               |      |          |
| <40                             | 214  | 168         | 78.5 | 46            | 21.5 | 0.5833   |
| 40–55                           | 683  | 553         | 81.0 | 130           | 19.0 |          |
| ≥56                             | 372  | 305         | 82.0 | 67            | 18.0 |          |
| Total                           | 1269 | 1026        | 80.9 | 243           | 19.2 |          |

## Appendix C

Improvements in body weight during military service with respect to military characteristics according to participants who were overweight before military service

|                                 | N   | Maintenance |      | Improvement |      | Deterioration |     | <i>p</i> |
|---------------------------------|-----|-------------|------|-------------|------|---------------|-----|----------|
|                                 |     | N           | %    | N           | %    | N             | %   |          |
| Military                        |     |             |      |             |      |               |     |          |
| Army                            | 203 | 43          | 21.2 | 160         | 78.8 | 0             | 0.0 | 0.0004 * |
| Navy                            | 89  | 14          | 15.7 | 75          | 84.3 | 0             | 0.0 |          |
| Marine corps                    | 47  | 4           | 8.5  | 43          | 91.5 | 0             | 0.0 |          |
| Air force                       | 134 | 15          | 11.2 | 111         | 82.8 | 8             | 6.0 |          |
| Branches                        |     |             |      |             |      |               |     |          |
| Combat                          | 277 | 49          | 17.7 | 227         | 82.0 | 1             | 0.4 | 0.0542 * |
| Technical                       | 146 | 20          | 13.7 | 121         | 82.9 | 5             | 3.4 |          |
| Administrative/special          | 50  | 7           | 14.0 | 41          | 82.0 | 2             | 4.0 |          |
| Service period (months)         |     |             |      |             |      |               |     |          |
| <6                              | 91  | 15          | 16.5 | 76          | 83.5 | 0             | 0.0 | 0.0132 * |
| 6–11                            | 132 | 21          | 15.9 | 110         | 83.3 | 1             | 0.8 |          |
| 12–17                           | 171 | 32          | 18.7 | 138         | 80.7 | 1             | 0.6 |          |
| ≥18                             | 79  | 8           | 10.1 | 65          | 82.3 | 6             | 7.6 |          |
| Type of workplace               |     |             |      |             |      |               |     |          |
| Large, middle, and small cities | 283 | 41          | 14.5 | 234         | 82.7 | 8             | 2.8 | 0.1365 * |
| Country, town, township         | 155 | 27          | 17.4 | 128         | 82.6 | 0             | 0.0 |          |
| Remote areas                    | 35  | 8           | 22.9 | 27          | 77.1 | 0             | 0.0 |          |
| Working hours (hours/day)       |     |             |      |             |      |               |     |          |
| <40                             | 81  | 15          | 18.5 | 66          | 81.5 | 0             | 0.0 | 0.6908 * |
| 40–55                           | 238 | 37          | 15.6 | 195         | 81.9 | 6             | 2.5 |          |
| ≥56                             | 154 | 24          | 15.6 | 128         | 83.1 | 2             | 1.3 |          |
| Total                           | 473 | 76          | 16.1 | 389         | 82.2 | 8             | 1.7 |          |

\* Analyses were performed using Fisher's exact test.
